# Supplementary material for: Analysis of Dynamic Plantar Pressure and Influence of Clinical-Functional Measures on Their Performance in Subjects with Bimalleolar Ankle Fracture at 6 and 12 Months Post-Surgery
Source: MDPI journal article supplement (doi:10.3390/s23083975), 2023-04-13
Supplement: s1 [file s1]

**Table S1.** Multiple linear regression models for dynamic plantar pressure variables. AFG at 6 months post-surgery.

| Models.                         | <i>F</i>    | <i>R</i> <sup>2</sup> | $\Delta R^2$ | $\frac{\text{Constant}}{B}$ | <i>Standard Error</i> | $\beta$  | <i>1- <math>\beta</math></i> | <i>f</i> <sup>2</sup> |
|---------------------------------|-------------|-----------------------|--------------|-----------------------------|-----------------------|----------|------------------------------|-----------------------|
| <b>Contact time</b>             |             |                       |              | 1923.35                     | 147.81                |          |                              |                       |
| Cadence                         | 34.5 (1.21) | 0.79                  | 0.76         | -6.70                       | 2.01                  | -0.49 *  | 0.99                         | 3.7                   |
| Speed                           |             |                       |              | -450.34                     | 137.26                | -0.48 *  |                              |                       |
| <b>Peak plantar pressure</b>    |             |                       |              | 3.09                        | 0.02                  | -0.58 ** | 0.83                         | 0.43                  |
| Bimalleolar perimeter           | 9.9 (1.21)  | 0.33                  | 0.30         | -0.07                       |                       |          |                              |                       |
| <b>Average plantar pressure</b> |             |                       |              | 1.58                        | 0.01                  | -0.52 *  | 0.68                         | 0.30                  |
| Bimalleolar perimeter           | 7.5 (1.21)  | 0.27                  | 0.23         | -0.03                       |                       |          |                              |                       |

\**p* < 0.05; \*\* *p* < 0.001; *F* = ANOVA; *R*<sup>2</sup> = Coefficient of determination;  $\Delta R^2$  = *R* Square adjusted; *B*: Non-standardised coefficient;  $\beta$  = Standardised coefficient; *1-  $\beta$* : Statistical power; *f*<sup>2</sup> = Effect size.

**Table S2.** Multiple linear regression models for dynamic plantar pressure variables. AFG at 12 months post-surgery.

| Models                          | <i>F</i>    | <i>R</i> <sup>2</sup> | $\Delta R^2$ | $\frac{\text{Constant}}{B}$ | <i>Standard Error</i> | $\beta$  | <i>1- <math>\beta</math></i> | <i>f</i> <sup>2</sup> |
|---------------------------------|-------------|-----------------------|--------------|-----------------------------|-----------------------|----------|------------------------------|-----------------------|
| <b>Contact time</b>             |             |                       |              | 1612.91                     | 147.81                |          |                              |                       |
| Cadence                         | 21.3 (1.20) | 0.70                  | 0.67         | -5.66                       | 1.44                  | -0.55 ** | 0.99                         | 2.1                   |
| Speed                           |             |                       |              | -246.61                     | 64.74                 | -0.51 ** |                              |                       |
| <b>Peak plantar pressure</b>    |             |                       |              | 3.38                        | 0.02                  | -0.67 ** | 0.96                         | 0.75                  |
| Bimalleolar perimeter           | 15.8 (1.20) | 0.45                  | 0.43         | -0.08                       |                       |          |                              |                       |
| <b>Average plantar pressure</b> |             |                       |              | 1.78                        | 0.01                  | -0.59 *  | 0.81                         | 0.42                  |
| Bimalleolar perimeter           | 9.9 (1.20)  | 0.34                  | 0.30         | -0.43                       |                       |          |                              |                       |

\**p* < 0.05; \*\* *p* < 0.001; *F* = ANOVA; *R*<sup>2</sup> = Coefficient of determination;  $\Delta R^2$  = *R* Square adjusted; *B*: Non-standardised coefficient;  $\beta$  = Standardised coefficient; *1-  $\beta$* : Statistical power; *f*<sup>2</sup> = Effect size.
